# Supplementary material for: Bioactive Compounds in Moringa oleifera Lam. Leaves Inhibit the Pro-Inflammatory Mediators in Lipopolysaccharide-Induced Human Monocyte-Derived Macrophages
Source: PubMed Central journal article supplement (PMC6982846; doi:10.3390/molecules25010191), 2020-01-02
Supplement: molecules-25-00191-s001.pdf [file molecules-25-00191-s001.pdf]

## SUPPLEMENT FIGURES

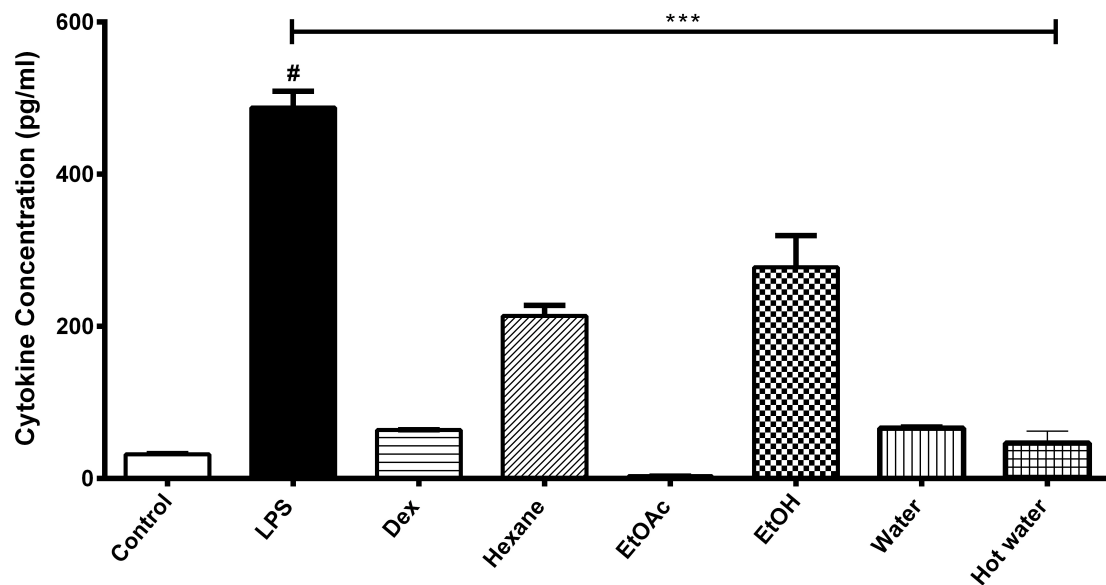

**Figure S1:** Effect of various MO leaves crude extracts on pro-inflammatory cytokines levels in LPS-induced MDM. Data are presented as means  $\pm$  SEM. # $p < 0.05$  compared to control, \*\*\* $p < 0.05$ , compared to LPS. Control: Untreated MDM; LPS: Lipopolysaccharide-stimulated MDM; Dex: Dexamethasone; EtOAc: Crude ethyl acetate; EtOH: Crude ethanol

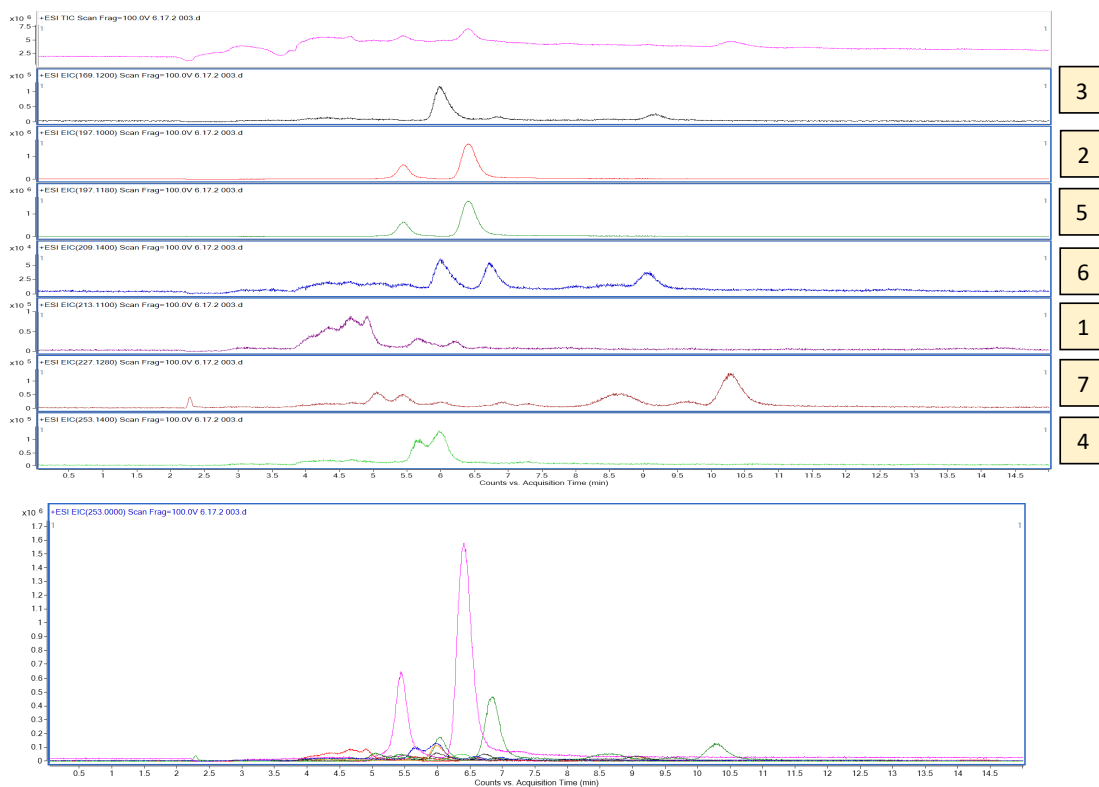

**Figure S2: Overlays of LC-MS chromatograms of MO subfraction 6.17.2 with active compounds no.1-7**

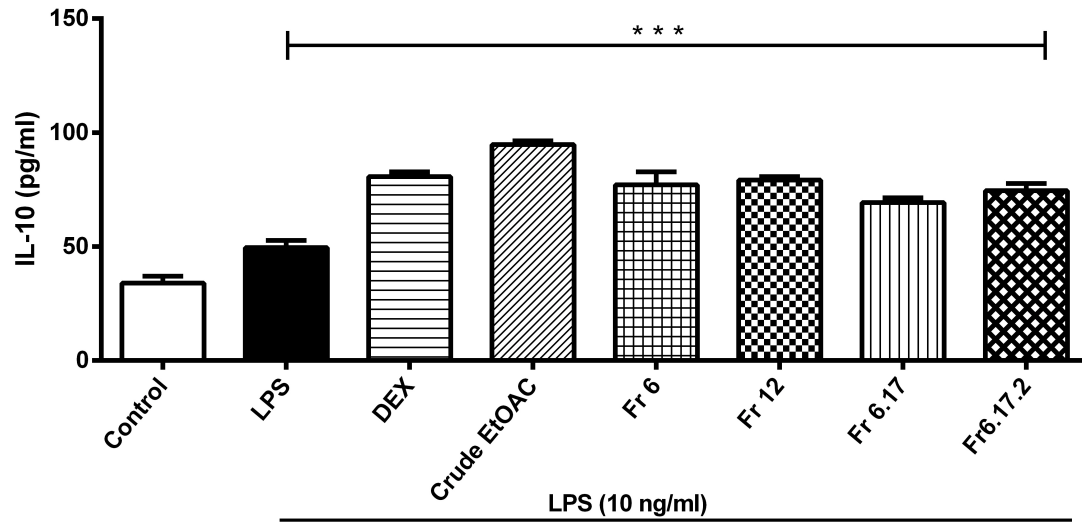

**Figure S3:** Effect of various MO leaves crude extracts on IL-10 anti-inflammatory cytokine level in LPS-induced MDM. Data are presented as means  $\pm$  SEM. # $p < 0.001$  compared to control, \*\*\* $p < 0.05$ , compared to LPS. Control: Untreated MDM; LPS: Lipopolysaccharide-stimulated MDM; Dex: Dexamethasone; Crude EtOAc: Crude ethyl acetate; Fr: Fraction
